# Supplementary material for: Comparison of growth in neutered Domestic Shorthair kittens with growth in sexually-intact cats
Source: PubMed Central journal article supplement (PMC10016642; doi:10.1371/journal.pone.0283016), 2023-03-15
Supplement: pone.0283016.s004.pdf [file pone.0283016.s004.pdf]

| Measure  | Units | Week | Estimated Mean and 95% credible Interval |                       | Fold Change vs 10wks |                   |                     |
|----------|-------|------|------------------------------------------|-----------------------|----------------------|-------------------|---------------------|
|          |       |      | Sexually Intact                          | Neutered              | Sexually Intact      | Neutered          | Difference          |
| Weight   | kg    | 10   | 1.08 (0.919, 1.29)                       | 1.03 (0.876, 1.20)    |                      |                   |                     |
|          |       | 18   | 2.02 (1.71, 2.41)                        | 1.91 (1.64, 2.26)     | 1.87 (1.57, 2.21)    | 1.86 (1.58, 2.2)  | 0.996 (0.786, 1.27) |
|          |       | 30   | 2.88 (2.49, 3.37)                        | 3.34 (2.85, 3.87)     | 2.66 (2.22, 3.10)    | 3.24 (2.72, 3.86) | 1.22 (0.954, 1.60)  |
|          |       | 52   | 3.18 (2.72, 3.75)                        | 4.06 (3.44, 4.84)     | 2.94 (2.42, 3.38)    | 3.94 (3.34, 4.71) | 1.34 (1.07, 1.72)   |
| Fat      | kg    | 10   | 0.150 (0.106, 0.206)                     | 0.130 (0.0941, 0.184) |                      |                   |                     |
|          |       | 18   | 0.377 (0.267, 0.522)                     | 0.318 (0.234, 0.472)  | 2.52 (1.84, 3.62)    | 2.44 (1.65, 3.39) | 0.971 (0.608, 1.52) |
|          |       | 30   | 0.640 (0.461, 0.930)                     | 0.723 (0.518, 1.02)   | 4.27 (2.87, 6.39)    | 5.55 (3.79, 7.69) | 1.3 (0.771, 2.15)   |
|          |       | 52   | 0.739 (0.536, 1.02)                      | 1.23 (0.886, 1.70)    | 4.93 (3.66, 7.11)    | 9.42 (6.78, 13.0) | 1.91 (1.09, 3.21)   |
| Lean     | kg    | 10   | 0.921 (0.800, 1.06)                      | 0.873 (0.750, 0.988)  |                      |                   |                     |
|          |       | 18   | 1.60 (1.39, 1.81)                        | 1.55 (1.34, 1.79)     | 1.73 (1.48, 1.99)    | 1.77 (1.52, 2.03) | 1.02 (0.812, 1.23)  |
|          |       | 30   | 2.15 (1.90, 2.47)                        | 2.51 (2.18, 2.88)     | 2.34 (2.00, 2.69)    | 2.87 (2.51, 3.39) | 1.23 (0.982, 1.48)  |
|          |       | 52   | 2.31 (2.01, 2.66)                        | 2.7 (2.34, 3.10)      | 2.51 (2.19, 2.87)    | 3.09 (2.71, 3.52) | 1.23 (1.03, 1.48)   |
| Height   | cm    | 10   | 15.9 (14.6, 17.1)                        | 16.4 (15.3, 17.6)     |                      |                   |                     |
|          |       | 18   | 21.1 (19.5, 22.7)                        | 20.4 (19.0, 21.6)     | 1.32 (1.23, 1.44)    | 1.24 (1.15, 1.35) | 0.937 (0.85, 1.04)  |
|          |       | 30   | 23.3 (21.5, 24.9)                        | 24.1 (22.4, 25.9)     | 1.46 (1.35, 1.57)    | 1.47 (1.36, 1.59) | 1.00 (0.892, 1.11)  |
|          |       | 52   | 24.6 (22.9, 26.5)                        | 25.7 (23.9, 27.5)     | 1.55 (1.44, 1.69)    | 1.56 (1.44, 1.69) | 1.01 (0.896, 1.13)  |
| Forelimb | cm    | 10   | 7.18 (6.75, 7.63)                        | 7.09 (6.70, 7.52)     |                      |                   |                     |
|          |       | 18   | 9.31 (8.84, 9.84)                        | 9.31 (8.83, 9.84)     | 1.30 (1.20, 1.40)    | 1.31 (1.22, 1.40) | 1.01 (0.922, 1.13)  |

| Measure     | Units | Week | Estimated Mean and 95% credible Interval |                   | Fold Change vs 10wks |                   |                     |
|-------------|-------|------|------------------------------------------|-------------------|----------------------|-------------------|---------------------|
|             |       |      | Sexually Intact                          | Neutered          | Sexually Intact      | Neutered          | Difference          |
|             |       | 30   | 10.6 (9.87, 11.2)                        | 10.8 (10.2, 11.4) | 1.47 (1.38, 1.60)    | 1.52 (1.41, 1.63) | 1.03 (0.932, 1.13)  |
|             |       | 52   | 11.1 (10.5, 11.9)                        | 11.6 (10.9, 12.2) | 1.55 (1.45, 1.68)    | 1.63 (1.51, 1.74) | 1.05 (0.955, 1.18)  |
| Elbow Width | cm    | 10   | 1.64 (1.55, 1.72)                        | 1.62 (1.54, 1.71) |                      |                   |                     |
|             |       | 18   | 1.87 (1.78, 1.98)                        | 1.83 (1.74, 1.93) | 1.14 (1.09, 1.22)    | 1.13 (1.07, 1.20) | 0.987 (0.917, 1.07) |
|             |       | 30   | 1.93 (1.83, 2.04)                        | 1.96 (1.87, 2.07) | 1.18 (1.11, 1.25)    | 1.21 (1.14, 1.28) | 1.02 (0.949, 1.10)  |
|             |       | 52   | 1.95 (1.85, 2.06)                        | 2.00 (1.90, 2.11) | 1.19 (1.13, 1.27)    | 1.23 (1.16, 1.31) | 1.03 (0.948, 1.13)  |
| Ribcage     | cm    | 10   | 20.6 (18.9, 22.3)                        | 20.1 (18.6, 21.7) |                      |                   |                     |
|             |       | 18   | 27.9 (25.7, 30.6)                        | 26.9 (24.7, 28.9) | 1.35 (1.23, 1.48)    | 1.34 (1.22, 1.48) | 0.990 (0.858, 1.13) |
|             |       | 30   | 31.8 (29.0, 34.6)                        | 33.4 (30.9, 36.0) | 1.54 (1.40, 1.67)    | 1.66 (1.51, 1.83) | 1.08 (0.933, 1.22)  |
|             |       | 52   | 34.2 (31.6, 36.9)                        | 39.4 (36.3, 42.5) | 1.65 (1.51, 1.81)    | 1.96 (1.77, 2.15) | 1.18 (1.02, 1.36)   |
| Length      | cm    | 10   | 23.7 (22.2, 25.8)                        | 23.4 (21.8, 25.2) |                      |                   |                     |
|             |       | 18   | 31.8 (29.7, 34.0)                        | 30.7 (28.2, 32.8) | 1.34 (1.24, 1.44)    | 1.31 (1.23, 1.43) | 0.981 (0.886, 1.09) |
|             |       | 30   | 35.2 (32.7, 37.7)                        | 36.5 (33.9, 38.9) | 1.48 (1.38, 1.59)    | 1.56 (1.45, 1.68) | 1.05 (0.956, 1.16)  |
|             |       | 52   | 38.0 (35.5, 40.6)                        | 39.3 (36.7, 42.0) | 1.60 (1.49, 1.73)    | 1.68 (1.56, 1.80) | 1.05 (0.939, 1.15)  |
| Hindlimb    | cm    | 10   | 8.83 (8.42, 9.22)                        | 8.68 (8.25, 9.05) |                      |                   |                     |
|             |       | 18   | 11.6 (11.1, 12.1)                        | 11.6 (11.1, 12.2) | 1.31 (1.25, 1.38)    | 1.34 (1.26, 1.41) | 1.02 (0.94, 1.10)   |
|             |       | 30   | 12.9 (12.4, 13.5)                        | 13.1 (12.6, 13.7) | 1.46 (1.38, 1.54)    | 1.51 (1.43, 1.60) | 1.04 (0.964, 1.12)  |
|             |       | 52   | 13.5 (12.9, 14.1)                        | 14.2 (13.6, 14.9) | 1.53 (1.46, 1.62)    | 1.64 (1.56, 1.72) | 1.07 (0.99, 1.16)   |

| Measure     | Units | Week | Estimated Mean and 95% credible Interval |                   | Fold Change vs 10wks |                   |                    |
|-------------|-------|------|------------------------------------------|-------------------|----------------------|-------------------|--------------------|
|             |       |      | Sexually Intact                          | Neutered          | Sexually Intact      | Neutered          | Difference         |
| Chest Depth | cm    | 10   | 7.25 (6.57, 7.92)                        | 6.95 (6.30, 7.59) |                      |                   |                    |
|             |       | 18   | 9.11 (8.29, 10.1)                        | 9.16 (8.37, 10.0) | 1.26 (1.10, 1.39)    | 1.32 (1.19, 1.46) | 1.05 (0.895, 1.24) |
|             |       | 30   | 10.9 (9.94, 11.8)                        | 11.1 (10.0, 12.3) | 1.50 (1.35, 1.69)    | 1.59 (1.41, 1.77) | 1.06 (0.904, 1.23) |
|             |       | 52   | 11.9 (10.8, 13.2)                        | 13.2 (12.0, 14.6) | 1.64 (1.47, 1.82)    | 1.90 (1.7, 2.13)  | 1.16 (0.966, 1.38) |
| Girth       | cm    | 10   | 20.1 (18.3, 22.0)                        | 19.1 (17.3, 21.0) |                      |                   |                    |
|             |       | 18   | 27.4 (24.9, 30.1)                        | 26.8 (24.4, 29.5) | 1.36 (1.23, 1.53)    | 1.40 (1.27, 1.56) | 1.03 (0.870, 1.21) |
|             |       | 30   | 32.2 (29.4, 35.2)                        | 33.3 (30.5, 37.6) | 1.60 (1.44, 1.79)    | 1.74 (1.54, 1.94) | 1.09 (0.909, 1.25) |
|             |       | 52   | 34.9 (31.5, 38.1)                        | 39.7 (36.0, 43.5) | 1.74 (1.56, 1.93)    | 2.08 (1.85, 2.32) | 1.20 (1.04, 1.39)  |

Bodyweight was measured by electronic scales; fat mass and lean mass calculated by dual-energy X-ray absorptiometry (Hologic QDR-1000 W; Hologic, Inc., Waltham, MA, USA); Height was measured at the points of the scapula; forelimb bone measured from olecranon to carpus; elbow width, measured across the humeral condyles; ribcage measured at the deepest part of the thorax; length measured from manubrium of the sternum to a parallel point below the anus; hindlimb bone measured from patella to tarsus; chest depth measured mid-thorax from spine to the deepest part; girth measured around the narrowest point of the waist. All measurements are shown to 3 significant figures.
